# Supplementary material for: Alternative splicing contributes to the coordinated regulation of ferritin subunit levels in Bactrocera dorsalis (Hendel)
Source: PubMed Central journal article supplement — Sci Rep. 2014 Apr 25;4:4806. doi: 10.1038/srep04806 (PMC3999511; doi:10.1038/srep04806), 2014-04-25

## Supplementary Section

### **Alternative splicing contributes to the coordinated regulation of ferritin subunit levels in**

#### ***Bactrocera dorsalis* (Hendel)**

Xuan-Zhao Jiang, Lin Cong, Jin-Zhi Niu, Wei Dou & Jin-Jun Wang\*

Key Laboratory of Entomology and Pest Control Engineering, College of Plant Protection,  
Southwest University, Chongqing 400715, P. R. China

**Correspondence:** Dr. Jin-Jun Wang, College of Plant Protection, Southwest University,  
Chongqing 400715, P. R. China. Tel: +86-23-68250255; Fax: +86-23-68251269. E-mail:  
[wangjinjun@swu.edu.cn](mailto:wangjinjun@swu.edu.cn) or [jjwang7008@yahoo.com](mailto:jjwang7008@yahoo.com).

Supplementary figures and figure legends

Poly (A) tail ▼

AAAAAAAAAAAAAAAAAAAAAAAAAAAAAAAAATGAAATTTGATTGAACTTAGCGTCATCGGTGTACATAAAATAAAGAAAG
CGGAAAAGTATGTGTATGTATAACAATCTATGTCCAAACGAATCACTGTCTTTATCGCGTGTGCGAGTCGGAATTATTG
TTTATTTAAATGCTACGAGTTACAAACAGCGATGTTTTCTGATTATTTACGTAAATTTATTTGAAGTTATCTATTTAAT
CACAAACATTACCGTGAATCTCTTATACTTAAAGCTGTTCTTTACCTCGGGGGCGGAAGTACCAGGCAATACTCTCAG
GCAATACTCTTTTCTTATGTATTTACGTTCCGAATGACATAAAGACACGCCTCATGAAATCTTTAAATAAACACAAAA
GTTATGGTTAATACATGAATATATAAACTGAAAAATCTCCTTTTCAAATATCTTTTATTTTAAATCTTTTTTTTCTACT
TTTAAATTTTAACTTTAAGTAAAGGCTAAAAAATTATATGATTATATAATCTTTGTGTTATTACGTTTTTCTTATGAT
AATAAAAAAGTATTTAAAGTTAAGTATGTATTAAAGTAGTGAATAAATAAATCAACCATATTTCATATTCTCTATTTCGT
GACGAGTAGGAAGCATGTCGTGTACGGCAGGCAGACAACCACAACCTCAAACCAGATTTACAACCTACAACCTACTGGTT
GACTGACGAACATCTAACAACATCAACAACATCCTCTATTAATGTTAACGAACAGCTTATTCTTAAAGCGGGTTTC

\* L Q K D F L F E G L A

CGGGAACCCACCGGTAGTAGAACCACTCACACGAGTTAAACGGTTCGGTTTAGCGCAACTGGCCACTCAACAAGGAGGT

G Q T A M M K T L T S L K G A L D R Q G T L Q E E L
TCTTAAGTGGCCAATCGGTGAGCTGGTTCAACCCACAGAAGAGCGTCTGGAAGTACTGCTTACG
F E G T L W D V L H Y W N P T K E C V L H Y W N P T
AGAAGAGCGTCTGGAAGTACTGCTTACGAGAACCACTGGAATCAAAGGTTAAGTTTCGCAACTGCCTCCCGCA
K E C V K I L S R I S K T V K T E L E L A Q R L A D
GCTGTGGCAGTGGAAATGTCAGTTGTAGgaaccttttgtgtctttttatattgcttttaccctccgtaatcaccttta
V G S D V K V D V D

aagtttttctgtcgtttaaaattaaacgtttttaaaattttaaaattttaaaattttaaagtctaaaaattaaagttttaacatttt
aagtttttaaccttaaaagattttttatatacaatttttagacaatcacacgtgaaTGTTACTCAACTTAGTTTAGCCACTGCGAG

I L Q I L D T V S

AGACAATTGACTGGTGCCTAGCTGTTTACATAAGTTACTCAAAGCTCGGTACGACTGCAAGGAGCGCACGGCTGAACTTC
E T L Q G R M S L Y E I L K S G H Q R E E R A S K F
TTCACGAGTCGCTTTGGCCCTGCTAACTGCTGTAGCGCACTCTTACACGTCGGTACCGGTTTCATCTACAACCTCCGT
F H E A F G P R N V V D R S F H A A M A L Y I N S A
AACTAGAGGTAAACCTAAACGAACGCGTAGAGGAGGTTTGTAAACAGGCGAGAACAGTAACTCCGGATAGGTGAGCTGC
N I E M Q I Q K R M E E L C Q G S K D N L G I W E V
CCTTAGCACCACGAGGTTTGGCGgaacaactctctacttttaaaacttattaatcgttatcgaccttaatcgctttttcacattttc
P I R P Q E L R C

Aaaactgtcttaaaactgtgaaagttacagtatgtaaaagttagtcacaaacaacatcgcatcatgttttaaaggcttcgagatataacgtatacat
acgtacatatttatacatgaattcatatagatacacatatacagagatgataatatacgtacatgcatatattacattttagcgtaaagagatcttg
aagacttagtcgtagacgcatagttatccgctgttttgttttataacgggatattgctgggacggagatgatgggaagctagcagctcttccgagca
atcctaagaccaaagccgtcaagtttacttaaatcgacattaatgttttatacatgaacgtatatacatataaaataaataatattatagccaaata
tatgtatagtgatcatttcagccgcatattcagtcctaactattatacatcctttctgtattattttctcgtgtgtgtgtgcatcgtataactaa
gtgtgcaaggtgtagcgggacggcctgtgtgtcgtgagatcccgctgtatcaactcccgcttccctaaatggtttcgtcgtgtaaacacagctgtagc
gacatcacggcacacgtttttagaggctcattttatgaggtgtgatactcatgcatttgtaaaacacaacagagctatcatgagctcgtctttaa
tttaaatctcaactcagttacacatgaaactagaacagttctgttatgagcgtttggatgtatgtatgacgtttacatataatataatgataatg

NF-kappaB

aatataatttcaaccttatattttccccccctatgccactttagttattaaatgtcaaatgtaaaatacagatttatataatgtatgtatataatgtata
tcctttactttcactttaattcactttattctttaattataagtttgcttctgaactctcgttttaactttcaacagggacctaatctcactactg
aaaatatagcttatattttagaaactttatcaataaaatagtttttaagcttattttcaactcaagcttcaatctgattcataagagttgagtttt
tgctgatttgttaaaacacttatacgaaataataataaagcagatacggcgcttctgccttacaattttaaaacttttcttaaatgacagccga
gatttatagcctcgtatcggcgtaaaatcagctcttccagacagttgagccttagtaaggagctttaaagattttataaaagacggcgatgt
tgggtgtgtttatgacataaaatgccataaaatgagtaaacgtggcttagatttggtaaacgatcactaattatggtttatgacatacgcataactcga
cggatgttccgatttgccaaatcggttatacgaacgtttgtttctcagactcatcagactctgccttttgcctttttatataatgttttaatttgttt
ttgtcgcagaatggataaactgattcgaatcgttagtctgtacctctttaaactctcaaaggcgtttttattttctttatatacatattttttat
acgctcaagtaattcaattcttttttttgtaacgttattttatgtaagtcagttacaactggcgttttttaatttttgggtgacacataaaacgta
tatagtgggcaaaaaactatttttgtaacgtttttgcggctttcagcttttgaaaagtttacagtaacaacatttgttttagtcaagcggaaagca
gtgtgacgatcggaaattgttttttagatgcataatggtttttgtttctccaagagtgacagaataaaaaagaaaagaccaatttcggtttgttttaa

NF-kappaB

gtgggaacaatttttggtagtcaaaacgagcagactttccatgagcaactttaggagctgtataaaaaactcgccttttaagtgtgagagagaacg
atgacactgtgatgtgagactcgctatactgagcttttacgctcgtgtgactttaaaaattcaagaaaagtaaaaacgtaaaataaatt
ctttttgttagtgaacgtgaaaggtgaaataaaacttatataaaattataaaaaaacatcaggactcaagttatgaaTGTTACTCAACTTAGTTTAGCCACTGCGAG

T M Q

CACGCAACTGGCGATGCCAGTCGTTGTTTTGACGCCGATTATTTAAAGTAGTA

A N V A V T L L L V A A L L K M M

TAAACACCGCTTTTAGTCCTAAAGAACGTGAGAAAGATACCGCACAGAGATGCAATTgacgtgttttcttttacttattaaga
ttaattttgtgccaatcaattatagaaaagttttcaaatatataaaagttacctatacatataaacggcagttgaggtgtgatcgaaccaatacac

gtgtttaaaccttttgtttattagctaaatgatagtgatccacttactatTTTTTccacactcacatcctttgtgctg**AAAAAAGACAAA**

C/EBP Pit-1a HNF-1 C/EBP GR H-TSS1 Oct-1 Sp1 TBP  
**AACTAACTTAAATCTTAAACTGTTAAAGAAGTTTGCTGACGAGCTAGACTAGACTAAGCGTTGGCGGAGA****CACGGAAA**

**Exon 3**  
**TATGTTGACCATATCTTCCGTTT**GC AACCGGAACTACTCAATTACGCAATCATATAGCGGACTATTATCTCAAGAT

**Iron responsive element**  
CGCAATCATATAGCGGACTATTATCTCAAGATCTGTGTTACCAGCAT**GT** TGAATCATTAGTGTTTAACTAACTTAATA

TGTTTAACTAACTTAACTTATAAACTGAACTTTCCTTTTAGAAAAAC**CGCCGCGACAGCATTTT**GAGAGAAAACAACA

H-TSS2  
ATGACTTACGCTTATGCATG**Actgacgaccactctact**tg gattgtg**aaaattt**acgggtgtgatagagagtcatgat

Oct-1 AP-1 Sp1 TBP C/EBP GATA-1  
TTGTATGTACGTATGTGTTTTTCGTTATCGTTTTAT

CGCGATCGCTCATGAACGTGTGCAACCCAGAAAGCGGTGAG**TG**AACATACATGCATACACAAAAGCAATAGCAAATA

**BR-C Z4**  
ATGTCTGCCAATATGTCGGCCTCGTATGATTCTTTGTTTCTACGTTGAGGTTGGTTCTTTTAGTAAT**ATTGTTTTTAT**  
TACAGACGGTTATACAGCCGGAGCATACTAAGAAACAAAGATGCAACTCCAACCAAGAAAATCATTATAACAAAATA

**TAAATGGACTCTTTTATATGCCATACACAGACTCCAATGCACGTCCGTATATGAGTATGAGTACTTGTGTATCG**  
**ATTTAACCTGAGAAAAATATACGGTATGTGTGCTGAGGTTACGTGCAGGCATATACTCATACTCATGAACAACATAGC**

GTATGCAATCAATTCGTCAGTTGTGATTTGTTTTCTTGTGAAATCATGCTCATGGGAGATGTGAGTATAGCCGATAGA  
CATACGTTAGTTAAGCAGTCAACACTAAACAAAAGAACACTTTAGTACGAGTACCCTCTACACTCATATCGGCTATCT

CGTTATATGGAGAGCATTCAAATTTGTGTAATCCAATATGGCGTCCGTAATGGTGGCTGCCGTTGACCTGAGTCAGCTG  
GCAATATACCTCTCGTAAGTTTAAACACATTAGGTTATACCGCAGGCATTACCACCGACGGCAACTGGACTCAGTCGCAC

GTTTTGTTTTCTTTGTTGTTTTTGGTTGCACATGGCTGTTGCTATTGCACATCAAAACAAAGGTCGTCTAGAGTTG  
CAAAACAAAAGGAAACAACAAAACCAACGTGTACCGACAACGATAACGTGTAGTTTTGTTTTCCAGCAGATCTCAAC

CCGTGTGCACATGAAGCGTAGTCATGTCTTTGATAAAACGTTTGTGCTATGAGCGCCAAAACCTATTAGACCATTATC  
GGCACACGTGTACTTCGCATCAGTACAGAACTATTTTGCAACAACGATACTCGCGGTTTTGATAATCTGGTAATAG

ATTCGAAATGTTATAATCTGCATAAACTCTTCTCAAATCTAACATATCATTTTTGAGTGACAACAGATCAAATCATCAT  
TAAGCTTTACAATATTAGACGTATTTGAGAAGAGTTTAGATTGTATAGTAAAACCTCACTGTTGTCTAGTTTAGTAGTA

**BR-C Z3**  
GAGGAATGACATTGTCTTAATGGTACATTAAATGGGCAGGCGCCTTTAAGATTAAGAACT**ATTCTAGTTTAAATCATA**  
CTCCTTACTGTAACAGAATTACCATGTAATTTACCCGTCGCGGAAATTTCTAATTTCTTGATTAAGATCAAATAGTAT

TATTACTTACATAAATATAGTTTTGAATTAGAAAATGGTTAAGCGATTCCCTTCAGGACCTTATGCACTCGAAATATGT  
ATAATGAATGTATTTATATCAAACCTAATCTTTTACCAAATTCGCTAAGGAAGTCCTGGAATACGTGAGCTTTATACA

**BR-C Z4**  
ACTTATATAGTTCTTAAAAATGTT**CATAGGAAAGAGAAT**GATTTATGTAATAATAAGAAATTAATGGTATTTATATC  
TGAATATATCAAGAATTTTTTACAAGTATCCTTTCTTTACTAAATACATTATTATTCTTTAATTACCATAAATATAG

**BR-C Z4** **BR-C Z3**  
AAAAATATGGGAGTGATATATCTGGCTGTTCTTAAACGGGATA**AAAAACAAAGATA**ATTATTT**AGATTAGTTTATCAC**  
TTTTTATACCCTCACTATATAGACCGACAAGAATTTTGCCCTATTTTTGTTTCTATTAATAAATCTAATCAAATAGTG

TGCCTCATTGCATGAATAATTCTATAATTTGCTTTTTAAGGGCGCACCCAGTAAGTTTTGAAATAAAAAAATCACTT  
ACGGAGTAACGTACTTATTAAGATATTAACGAAAAATTTCCCGCTGGGGTCATTCAAACCTTTATTTTTTTAGTGAA

**BR-C Z1** **BR-C Z4**  
TATCG**ATTTTGTTTTTAATTTT**AGGCATATTTTTTCAACTGAAACGTGATTTTCGACGGCGCTAAGATAAAGATCCT  
ATAGCTAAAACAAAATTTAAAATCCGTATAAAAAGTTGACTTTGCACTAAAAGCTGCCGCGATTCTATTTCTAGGA

CCTCTGCCGCTGTGATTTCTGCATTGTGGAACGTGTTGAAGCTGAATAAAATCAGCGGCCTGACTTTAGAAGGTTGTGA  
GGAGACGGCGACACTAAAGACGTAACACCTTGACAACCTCGACTTATTTTAGTCGCCGGACTGAAATCTTCCAACACT

ACTGTTTGGAGTATCGACTTAAAATTTTACAATTTTGGTTTTAACCCTCGGCGGCCTTCGCTATTTTTGCCCTGTTTG  
TGACAAACTCCATAGCTGAATTTTAAAGATGTTAAAACCAAATTTGGGAGCCGCCGGAAGCGATAAAAACGGGGACAAAC

CAAAACCCGATCATTGTTAGTCGAATCGACTAACAAAGCTAGTCCAGGGCCACATATAACCTATCAAATATGGCCGA  
GTTTTGGGCTAGTAACAATCAGCTTAGCTGATTGTTTCGATCAGGTCCCGGTGTATATTGGATAGTTTTATACCGCT

AAAAAATAAGTTATAAAAAAACTGAAGATTAATCATATAATATAATCTTTGGGCTTAGTATAATAGTTTGTAGATTTTC  
TTTTTTATTCAATATTTTTTTGACTTCTAATTAGTATATTATATTAGAAACCCGAATCATATTATCAAACCTATCAAAG

TAGTAAGGGGTTTAGTAATATTTCTTATTAGAGCACGCGCATTTTAGATGACGTGTACATAGAAAAATTTTGCACACA  
ATCATTCCCCAAATCATTATAAAGAATAATCTCGTGCGCGTAAATCTACTGCACATGTATCTTTTTAAACGTGTGT

GAAATTAAGGTGCGCCATAGAAAAACAGCGTTCTAGTAGCAAGGGCTTTTTAATTTGCAGACTAGCCTACACTAACT  
CTTTAATCCACGCGGTATCTTTTTGTGCGAAGATCATCGTTCCCGAAAAATTAACGTCTGATCGGATGTGATTGA

GCATTAAGTTGTGCGAAGATAAATCAATCAAATAAGACACACGTGCGATATGAACAAGTCAAAGACTTGATGACTAACG  
CGTAATTCACAGCTTCTATTTAGTTAGTTTATTCTGTGTGCACGCTATACTTGTTTCAGTTTCTGAACTACTGATTGC

ACAACCCTAAAATCTCTCGAAATCTCTATATAACAACGCTTCTAAATATGTGTGTGTGTTGATGAGGAAAAACAACTCTA  
TGTTGGGATTTTAGAGAGCTTTAGAGATATATGTTGCGAAGATTTATACACACACAACTACTCCTTTTGTGAGAT

CTAAGAGCGCACTAAAGTGGCCGCCATATTGCGGCAATGTGTTATCTACTCAGTAGAGAGACACAGCGACGAGTGCAA  
GATTCTCGCGTGATTTACCAGCGGTATAACGCCGTTACACAATAGATGAGTCATCTCTCTGTGTGCTGCTCACGTT

ATGCGCTTATGTATGTGTGTGTGAGTGTAAGGCATTATCGATCGAATAGAAACGACCAGACACAGGCATTATAAGCG  
TACGCGAATACATACACACACTCACATTTCCGTAATAGCTAGCTTATCTTTGCTGGTCTGTGTCCGTAATATTCGG

ACAGTTGGAAATTTTCATTTCAATTGAAACACATCTGTGCTTAAACAATATAAAAAACAAAGAGAGCGTGTTATTAACA  
TGTCACCTTTAAAAGTAAAG

C/EBP ICSBP Oct-1 L-TSS1 TBP GATA-1 HNF-3

BR-C Z3

AGTAAAAAACTAAATACTGCCTAAATCTTAATTGAGACATTGAGATATATTCAATAAGCCCTTTGTGAATTATTATT  
AGgttaagtgttaggaagtttatcagaagtttagttgaggtgaggtgaaaccttttaaatgtccatacactttaagagacattatctcgaata

BR-C Z3

tacaactcaaacGcgtcggtgtgtgctccagagaaacaaacgaattgaatgtgtgtgtaagcgaagaggttagaaaaaaaagcgaatatcgagt

BR-C Z4 BR-C Z1

aaaataacttgaaacgcaataagtgcatgaaaacaaaactatatgtttttcaaattttgtcacatcttacaacaaacaaataaaaaacaaaatattta  
acaacaattaattggtataaatttcttcgtttctttgagAGTTAAATACTCAGAAAATTAAGCCAAAGTTATGAAGCCTTTTA

M K P F

CTGCGCTTACTCTGTTTGCGGGCATTATCGCCCTGGTCAGCGCTGACAACACTACGCCTGTCACTCCAATGTGACTGTGCG

T A L T L F A G I I A L V S A D N Y A C H S N V T V

GCTGCAGCAACAGTGCCTCAAATAAGTAAAGCAAGAACAATAACAACAAAAAGTCAAATGCATAATCCGTGCTCAAAC

G C S N S A S Exon C

ACGAGAAAGTGCTCATATACCGAGTTTTACTAAATTAATTCCTGTTTTTTTTTTGTTTTTTTCTTCTCTTTATGCTTAC

NF-kappaB

AGCCCCCGTGGTTTGCCATTCCCCTTATGGCGGCATTGAAAATGTGCAATCTACCATTCAATCCTACATCAATTTGAA

T P V V C H S R Y G G I E N V E S T I Q S Y I N L N

TCTGCACAAGTCCATCAATATCTGTTGTTGTCATCCTTCTACAACCTCATACCAGAAGAATCGTCCCAGTTTCAACAA

L H K S Y Q Y L L L S S F Y N S Y Q K N R P G F N K

GCTCTACCGTGATTTGTGCGACCGCTCTTTTCGATGATGCTATTGATTTGATTAAACATGTAACACGTGCGGGTGGCCA

L Y R D L S D R S F D D A I D L I K H V T R R G G Q

GTTGACTTCCGTGCCATCAGTCAGCACCCCAACTCTATTGCTCAAAGTAGATTGAAATTTGGAGGAGGATGAATTACAC

V D F R A I S Q H P N S I A Q S R L K L E E D E L H

TCATTGGGCATTGCTTTGGACATTGAGAAGACCTTGACCCTGATGCTGGCCACGTACTACCAGTCGACACATGGA

S L G I A L D I E K T L T A D A G H V H Y Q S T H G

CGCCACATGACCCACAGACCGCTCACTACATTGAGGAGAAATTCCTGCACAAACAGGCTGATTCCGTGCGCAAGGTT

R P H D P Q T A H Y I E E K F L H K Q A D S V R K V

TCGGGCTTCGTCAACGATTTGTGCGAAGATCATGAACCAACCCGATCCCTCATTGGGCATCTACTTATTTCGACCAGTAC

S G F V N D L S K I M N Q P D P S L G I Y L F D Q Y

TTGGAGAAGCAATAATGGTTGGGCTAGGGAGTAACCCGTAGATGAATAAGCTGGTCATGAACCTCTTCGTTATTTAC

L E K Q \*

CTGTTGCAGCAGTGAAGATTGTGCGCTGACTTACAGATTAGTTCAGCTGGAGCTGATAATAACCATATAACTTACGTT

CAAGAATCTATACGTATTTCTTTAATTACATTACCAACGAAAACAAAACGATGTAACCTAAATTTGTTTGAATAATA

▼ Poly (A) tail: AAAAAAAAAAAAAAAAAAAAAAAAAAAAAA

TAAATTCCTCACTTTTCGCATTTAAATCTTTCAGCTTTGTGACTACTAATTAGGCCACAGCCAACCAAGTTCAGCTTATG

GCACAAAGGCGCATCCATGAAATATACGTATTATTAACAATAAGTGCTACAACATTTTTGAATTTCTATTATTATTT

ACTCTACATGAAGTTGTAACCTTTTTCTAATGGATTACATTGAAAATATTAATGTTAAAAATAACGAAATAGTAAAAAA

ATTAATAATACGGCTCTCATATTTGTTTGTTCATTGAATTGTGATACTTGGTGCAGAA

**Supplementary Figure 1: Genomic DNA sequences and TFBSs analysis of *BdFer1HCH* and *BdFer2LCH*.** The exons, untranslated regions and sequences between the transcription start sites (TSS) of *BdFer1HCH* and *BdFer2LCH* are shown as uppercase letters. Introns are shown as lowercase letters. For the coding regions, the encoded amino acids are denoted below the corresponding nucleotides. The terminal codon is represented using an asterisk. The amino acids implicated in ferroxidase center are shaded in red. The putative N-Glycosylation sites are underlined with red lines. Alternatively spliced exons are shaded in gray. The iron responsive element (IRE) is highlighted in black and the consensus hexanucleotide loop (5'-CAGUGU-3') is bolded. The splicing consensus sequences gt-ag are in bold. Sequences between the TSSs are shown as double strands. Broken arrows indicate the transcription direction. H-TSS1 and H-TSS2 in *BdFer1HCH* results from alternative promoters. The canonical polyadenylation signals and those identified in this study are underlined; those uncanonical are double underlined. The amino acids in the putative cleaved signal peptide are boxed. The poly (A) sites are indicated with "▼" and the added poly (A) tails are also shown. The putative transcription factor binding sites (TFBSs) are shown on the sense strands, underlined and denoted with the corresponding names.

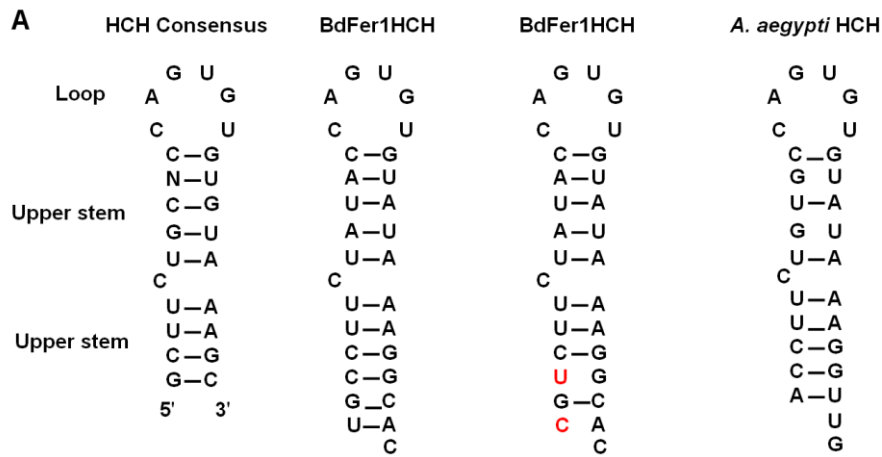

**B**

| Species            | Gene names       | Subunit type | Ferroxidase<br>center | Signal peptide | N-Glycosylation<br>site | IRE | Number of introns |
|--------------------|------------------|--------------|-----------------------|----------------|-------------------------|-----|-------------------|
|                    | <i>BdFer1HCH</i> | HCH          | +                     | +              | +                       | +   | 3                 |
| <i>B. dorsalis</i> | <i>BdFer2LCH</i> | LCH          | -                     | +              | +                       | -   | 1                 |

**Supplementary Figure 2: The structure of iron responsive elements and features of ferritin of *Bactrocera dorsalis*.** (A) Comparison of the iron responsive elements (IREs) of *B. dorsalis* and *A. aegypti* with the consensus IRE motif. The potential RNA editing sites are shown in red. (B) Features of *B. dorsalis* ferritins.

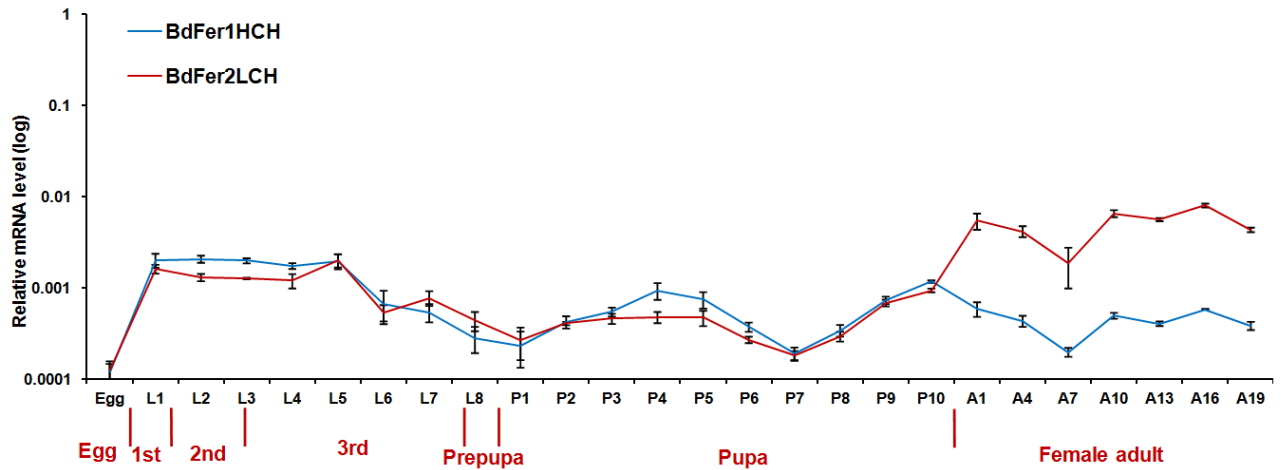

**Supplementary Figure 3: Developmental stage expression profiling of *BdFer1HCH* and *BdFer2LCH*.** RT-qPCR analysis was performed on the relative mRNA levels at four developmental stages including one sample of eggs, eight samples of 1–8-day-old larvae, ten samples of 1–10-day-old pupae, as well as seven samples of 1–19-day-old female adults at 3-day intervals. Results are represented as mean  $2^{-\Delta Ct}$  values of three independent biological replicates  $\pm$  SEM. 1st, first instar larvae; 2nd, second instar larvae; 3rd, third instar larvae.

## Supplementary tables

### Supplementary Table 1 Primers used in cDNA full-length cloning and genomic DNA sequence cloning

| Primer names                               | Primer sequence (5'→3')   |
|--------------------------------------------|---------------------------|
| <b>Primers used in RACE</b>                |                           |
| BdFer1HCH-3'RACE                           | TACTCCGCACAGAAATACAGTAAG  |
| BdFer1HCH-5'RACE(1)                        | TCAGCGAAACCGGGACGATTGAC   |
| BdFer1HCH-5'RACE(2)                        | CTCTTTCTATGGCGTGTCTC      |
| BdFer2LCH-3'RACE                           | TGACCCACAGACCGCTCACTACAT  |
| BdFer2LCH-5'RACE                           | AACCGGGACGATTCTTCTGGTATG  |
| NUP                                        | AAGCAGTGGT AACAAACGCAGAGT |
| <b>Primers used to amplify ORF</b>         |                           |
| BdFer1HCH-F                                | ACAGAGGCGGTTGCGAATCAG     |
| BdFer1HCH-R                                | TGAATCGCAGTAGCCACATG      |
| BdFer2LCH-F                                | GGGTCATTGAAACACATCTG      |
| BdFer2LCH-R                                | TTCTCGCACCAAGTATCACA      |
| <b>Primers used to amplify genomic DNA</b> |                           |
| a-F                                        | CAAGGCTTACTGTATTTCTGTGC   |
| a-R                                        | GATCAATGCCTCCAACATCTAC    |
| b-F                                        | AAGAAGTGCTCAGCGAAACC      |
| b-R                                        | CGAAGGGTAGTAGAGGCAGG      |
| c- F                                       | CCGCTCTTGTCATTGAGG        |
| c- R                                       | GCATTGGAGTCGTGTGTATG      |
| d-f                                        | CAATATGTCGGCCTCGTATGATTC  |
| d-r                                        | AACCGGGACGATTCTTCTGGTATG  |
| e-F                                        | AATTAAAGCCAAAGTTATGAA     |
| e-R                                        | CAAACAAATTTAGTTACATCGT    |
| f-F                                        | CCGCTCTTGTCATTGAGG        |
| f-R                                        | TTCTCGCACCAAGTATCACA      |
| g-F                                        | TGTCATTTGAGCTCCAATTG      |
| g-R                                        | GGGTCATTGAAACACATCTG      |

F: forward; R: reverse



**Supplementary Table 2 Primers used in identifying multiple transcripts and RT-PCR analysis**

| Primer names                                       | Primer sequence (5'→3')  | Products   |
|----------------------------------------------------|--------------------------|------------|
| <b>Primers used in RT-PCR for <i>BdFer1HCH</i></b> |                          |            |
| HCH-F                                              | GATCAATGCCTCCAACATCTAC   | BdFer1HCH  |
| HCH-R                                              | AGTGTGCTCAATTTGCCAGC     |            |
| H-TSS2-F                                           | CAACAAAGAGAGTTTTACGACAGC | H2         |
| H-TSS2-R                                           | AACTGCGGCTAATAATTTTCATC  |            |
| H-TSS3-F                                           | GCATTGGAGTCGTGTGTATGG    | H3         |
| H-TSS3-R                                           | CTCTTTCTATGGCGTGTCTCTAC  |            |
| <b>Primers used in RT-PCR for <i>BdFer2LCH</i></b> |                          |            |
| LCH-F                                              | AATTAAGCCAAAGTTATGAA     | BdFer2LCH  |
| LCH-R                                              | CAAACAAATTTAGTTACATCGT   |            |
| LCH'-F                                             | AATTAAGCCAAAGTTATGAA     | BdFer2LCH' |
| LCH'-R                                             | AGTTGGGGTGCTGACTGATG     |            |
| L-TSS2-F                                           | GACCAGACACAGGCATTATAAGC  | L2         |
| L-TSS2-R                                           | AGGACTTGTGCAGATTCAAATTG  |            |
| L-TSS2'-F                                          | GACCAGACACAGGCATTATAAGC  | L2'        |
| L-TSS2'-R                                          | AGTTGGGGTGCTGACTGATG     |            |

F: forward; R: reverse.

**Supplementary Table 3 Primers used in RT-qPCR**

| Primer names    | Primer sequence (5'→3')  |
|-----------------|--------------------------|
| BdFer1HCHq-F    | CTGCGAGAAGACACCCAAC      |
| BdFer1HCHq-R    | AGTGTGCTCAATTTGCCAGC     |
| BdFer2LCHq-F    | CGGACCGCTCTTTCGATGAT     |
| BdFer2LCHq-R    | AGTTGGGGTGCTGACTGATG     |
| Diptericinq-F   | CAGTTCCTTGCTTATCCCAGAGA  |
| Diptericinq-F   | GCCCAAATGTTGCGAATAC      |
| EF1 $\alpha$ -F | CGTTGGTGTCAACAAGATGG     |
| EF1 $\alpha$ -R | TGCCTTCAGCATTACCTTCC     |
| 18S-F           | GCGAGAGGTGAAATTCTTGG     |
| 18S-R           | CGGGTAAGCGACTGAGAGAG     |
| SD-F            | CAAGTGCAAAGGTGTGTTGG     |
| SD-R            | GTCGCAATGACGGTGTTATG     |
| $\alpha$ Tub-F  | CGCATTTCATGGTTGATAACG    |
| $\alpha$ Tub-R  | GGGCACCAAGTTAGTCTGGA     |
| $\beta$ TUB-F   | TTACATTTCTTTATGCCTGGTTTC |
| $\beta$ TUB-R   | CATTTGTTTCGTCCACTTCCTTC  |
| RPE-F           | GTTACGGCGAGGACAGTTTG     |
| RPE-R           | CACGCAATGCTTCACGACC      |
| ACT-F           | GTGTGATGGTTGGTATGGGA     |
| ACT-R           | GGCTGGGGAGTTGAAGGTTT     |
| RPL13-F         | CAGTTGTACGTTGCGAGGAATT   |
| RPL13-R         | TCTTGATGGAGCACGGGAG      |

F: forward; R: reverse

**Supplementary Table 4 Stability estimation of candidate reference genes**

| Ranking order | Gene names                         | Geomean of ranking values in whole larvae after iron overload | Gene names                         | Geomean of ranking values in midgut after iron overload | Gene names                         | Geomean of ranking values in <i>E. coli</i> challenged larvae |
|---------------|------------------------------------|---------------------------------------------------------------|------------------------------------|---------------------------------------------------------|------------------------------------|---------------------------------------------------------------|
| 1             | <i><math>\alpha</math>-tubulin</i> | 1.57                                                          | <i><math>\alpha</math>-tubulin</i> | 1.41                                                    | <i><math>\alpha</math>-tubulin</i> | 1.50                                                          |
| 2             | <i>18S ribosomal RNA</i>           | 1.73                                                          | <i>actin 2</i>                     | 1.86                                                    | <i>ribosomal protein L13</i>       | 2.21                                                          |
| 3             | <i>actin 2</i>                     | 2.00                                                          | <i>ribosomal protein L13</i>       | 2.45                                                    | <i>actin 2</i>                     | 3.46                                                          |
| 4             | <i>ribosomal protein L13</i>       | 4.23                                                          | <i>elongation factor-1a</i>        | 3.94                                                    | <i>18S ribosomal RNA</i>           | 3.98                                                          |
| 5             | <i>succinate dehydrogenase</i>     | 4.61                                                          | <i><math>\beta</math>-tubulin</i>  | 4.16                                                    | <i>succinate dehydrogenase</i>     | 4.14                                                          |
| 6             | <i>elongation factor-1a</i>        | 5.73                                                          | <i>18S ribosomal RNA</i>           | 5.73                                                    | <i>elongation factor-1a</i>        | 4.16                                                          |
| 7             | <i>RNA polymerase II</i>           | 7.00                                                          | <i>RNA polymerase II</i>           | 7.24                                                    | <i>RNA polymerase II</i>           | 5.38                                                          |
| 8             | <i><math>\beta</math>-tubulin</i>  | 8.00                                                          | <i>succinate dehydrogenase</i>     | 7.74                                                    | <i><math>\beta</math>-tubulin</i>  | 8.00                                                          |

Figure 3

Figure 3A

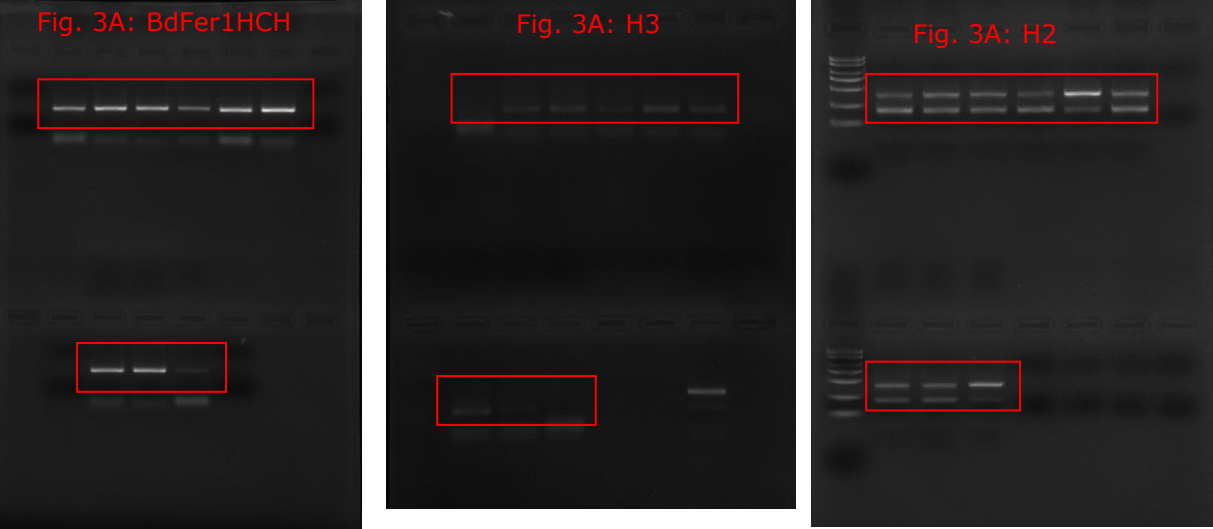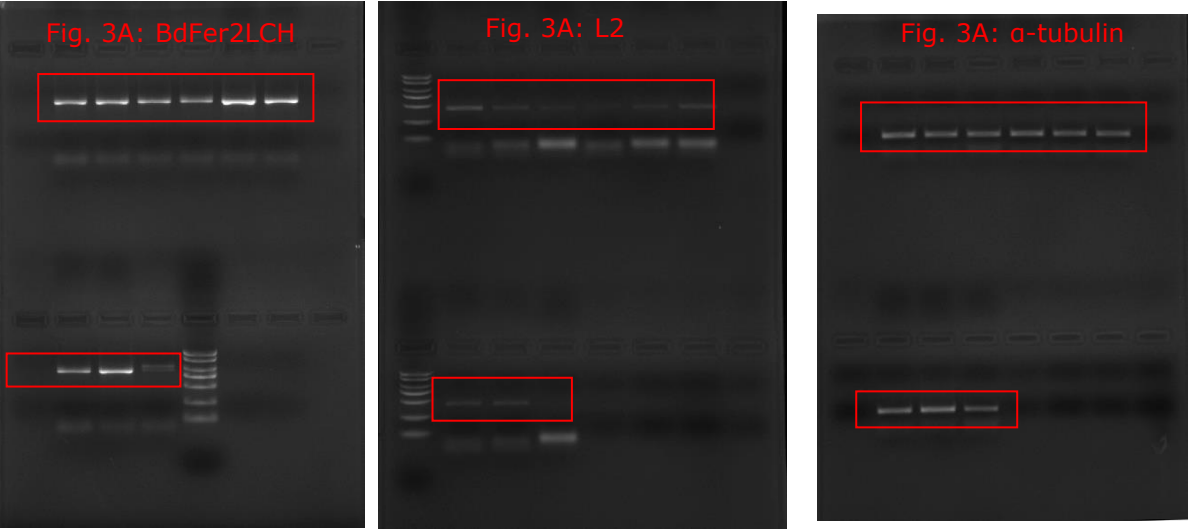

Figure 3B

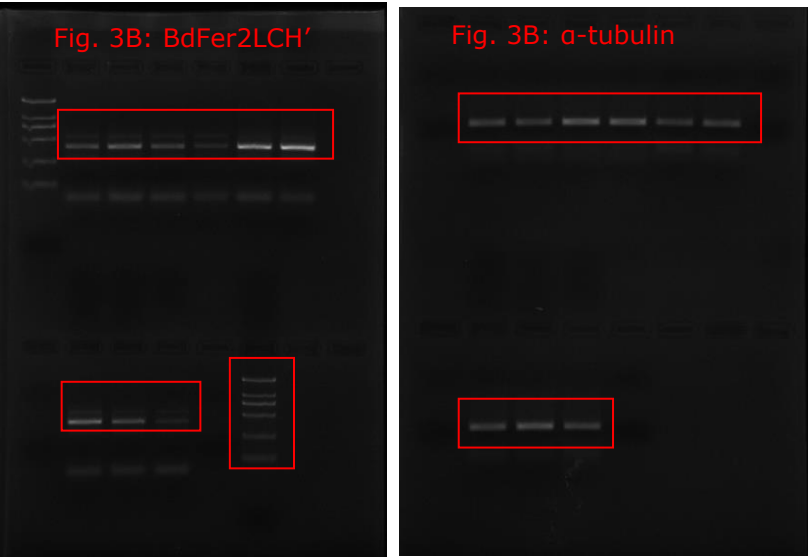

Figure 3C

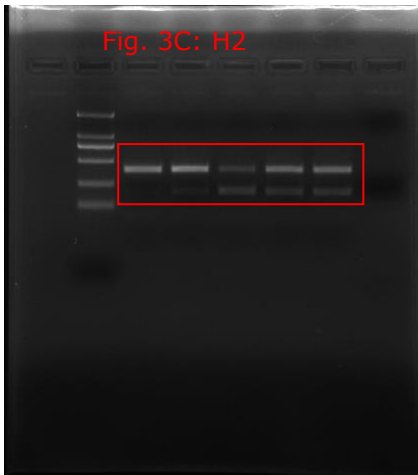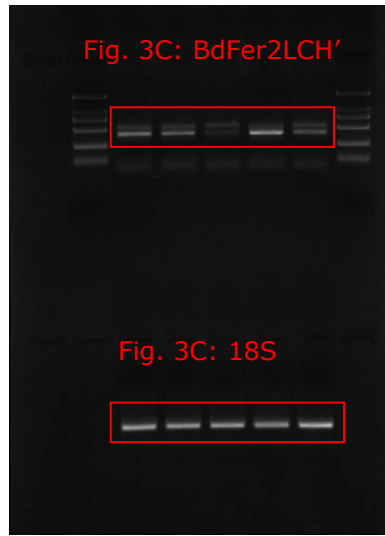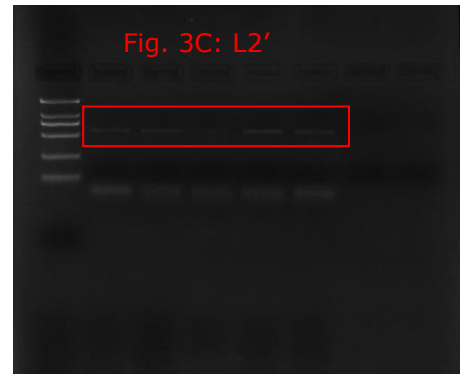

Figure 5

Figure 5C

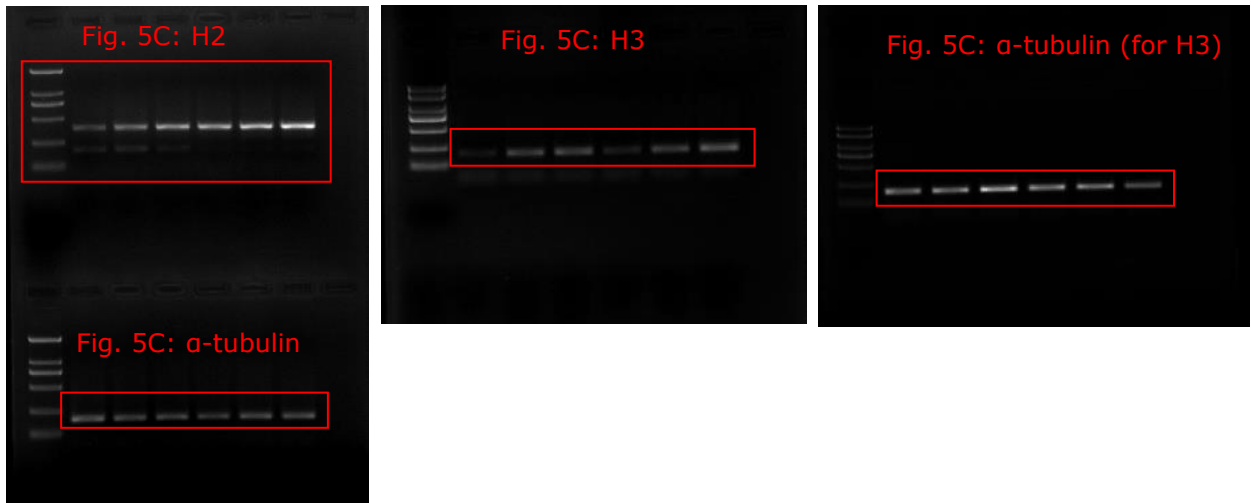

Figure 5D

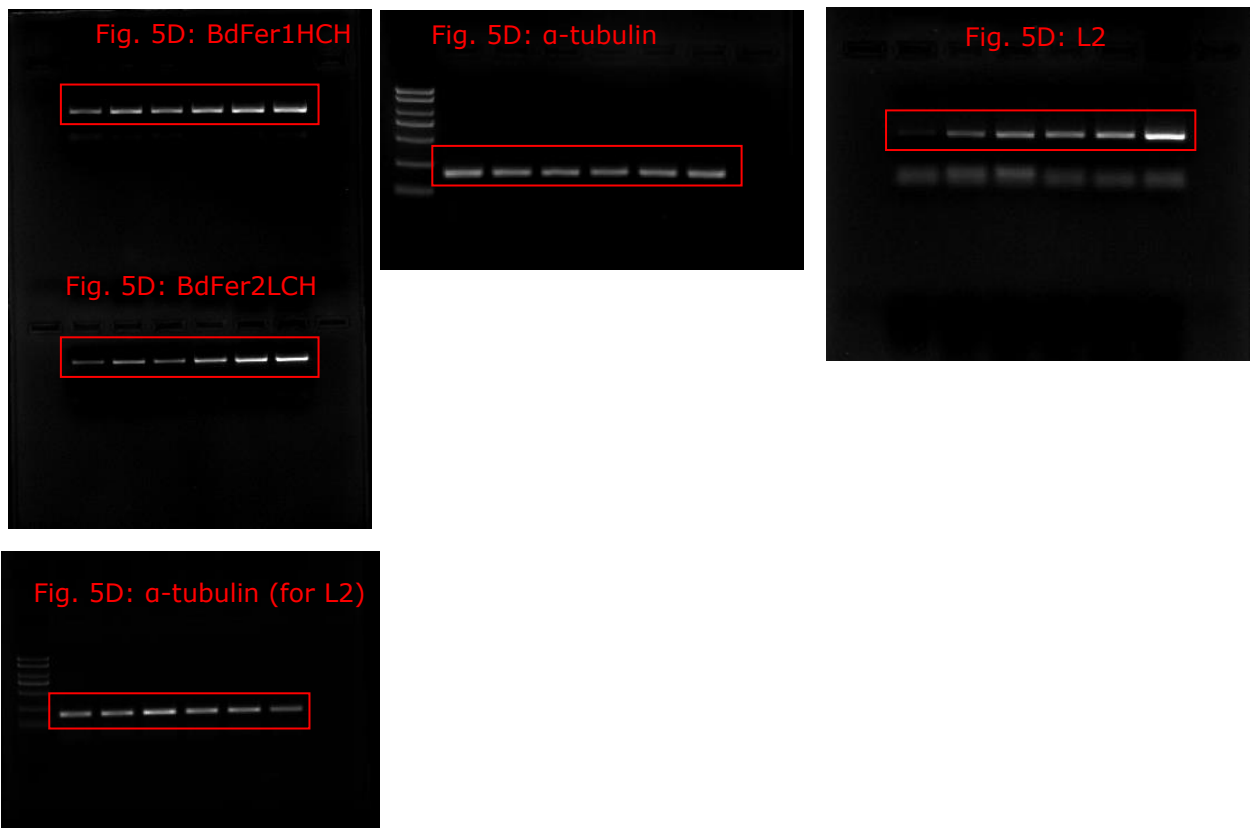

Supplement: srep04806-s1.pdf [file srep04806-s1.pdf]
